# Supplementary material
Source: publisher figshare collection journal article supplement (https://tandf.figshare.com/articles/dataset/_/5046832)

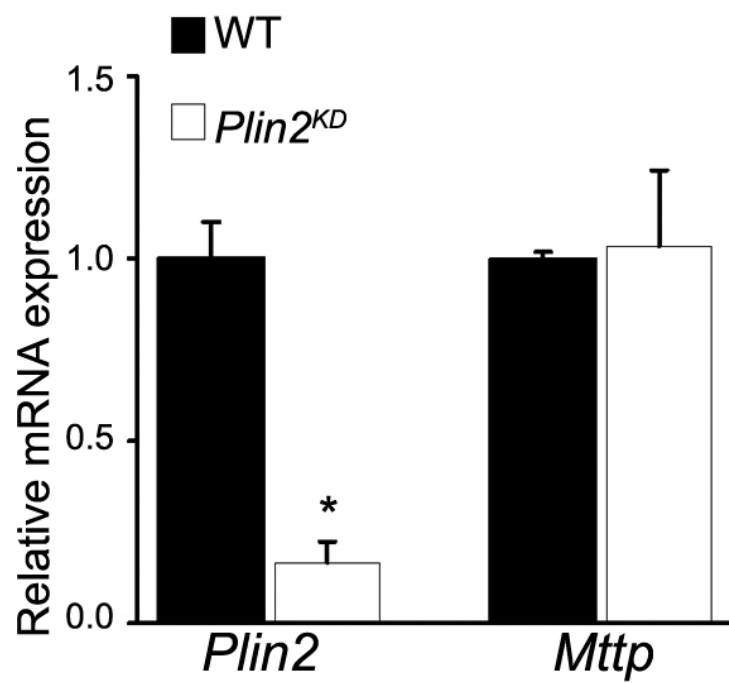

**A**

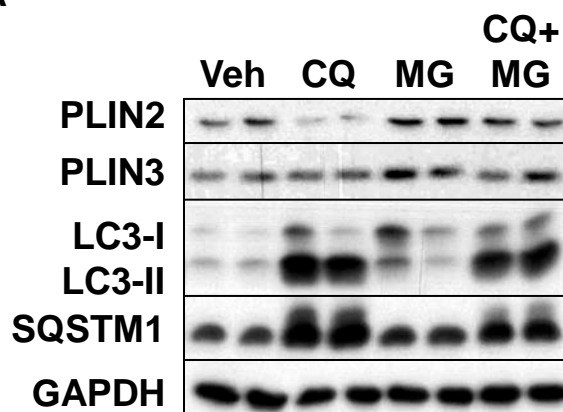

**B**

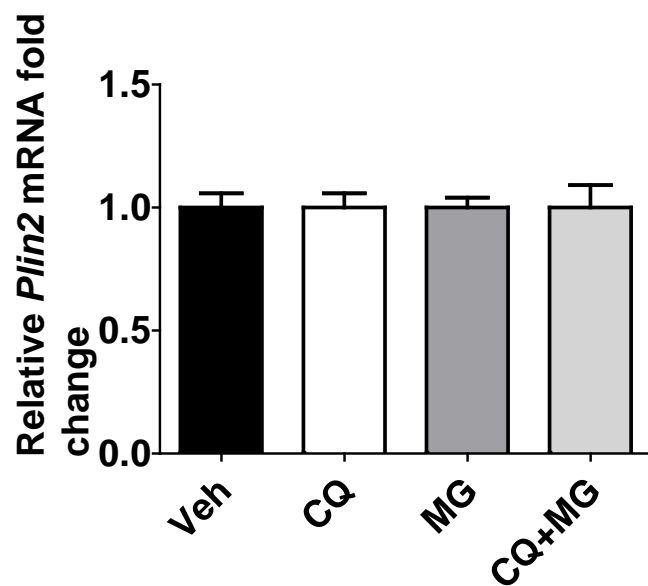

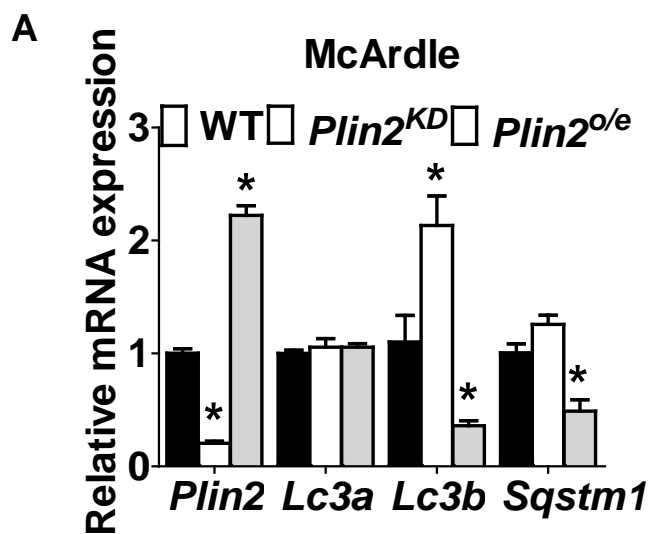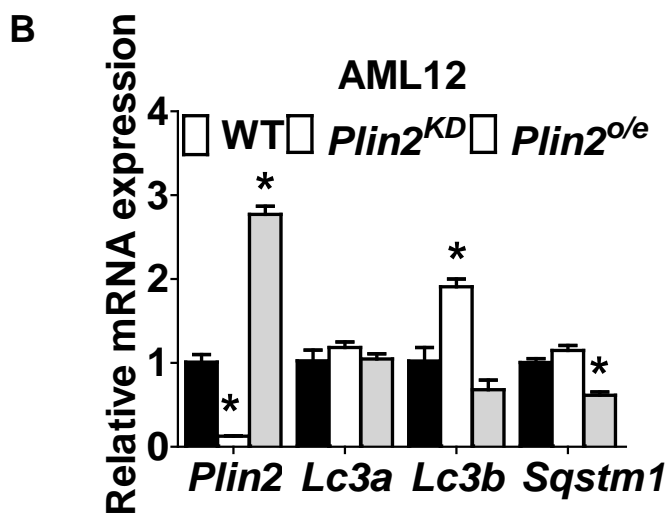

**A**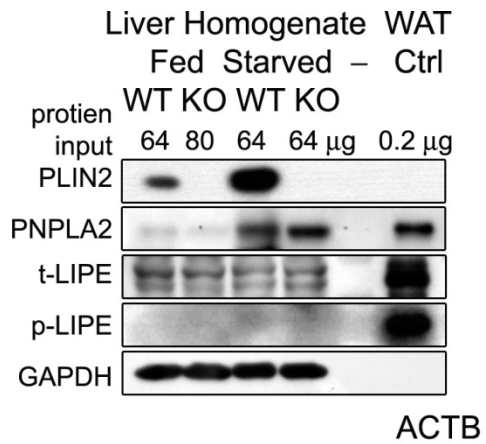**B**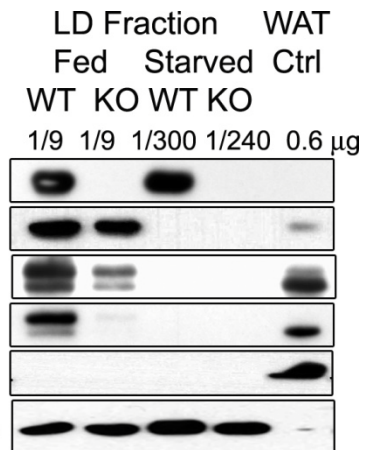

**A**

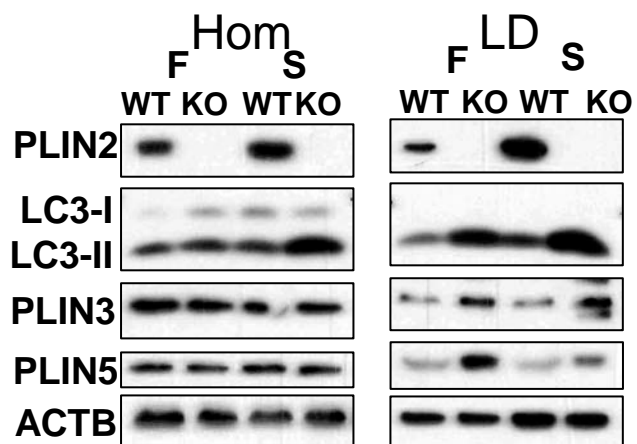

**B**

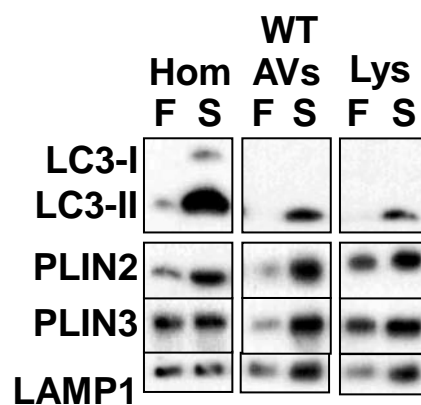

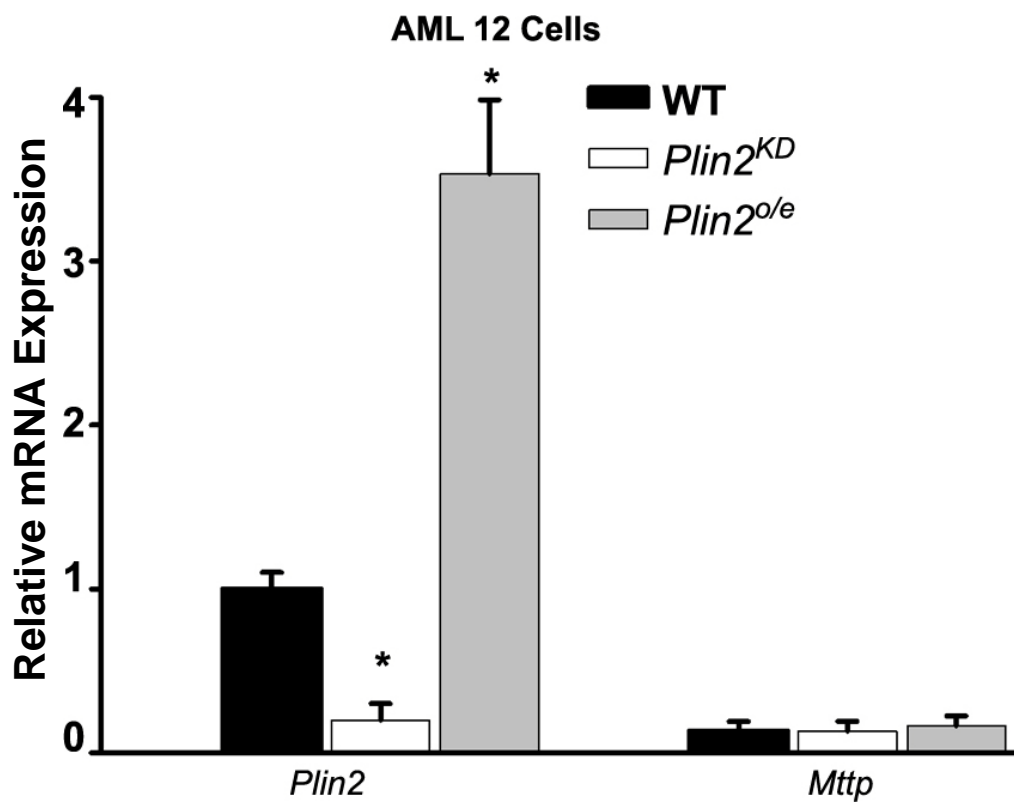

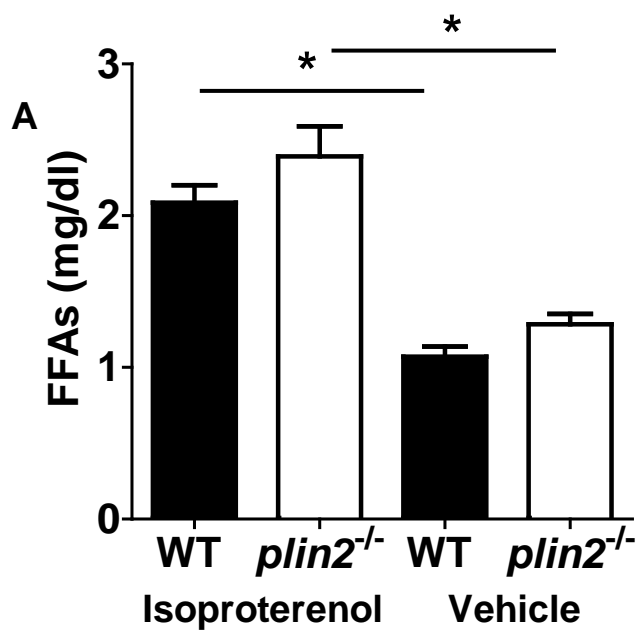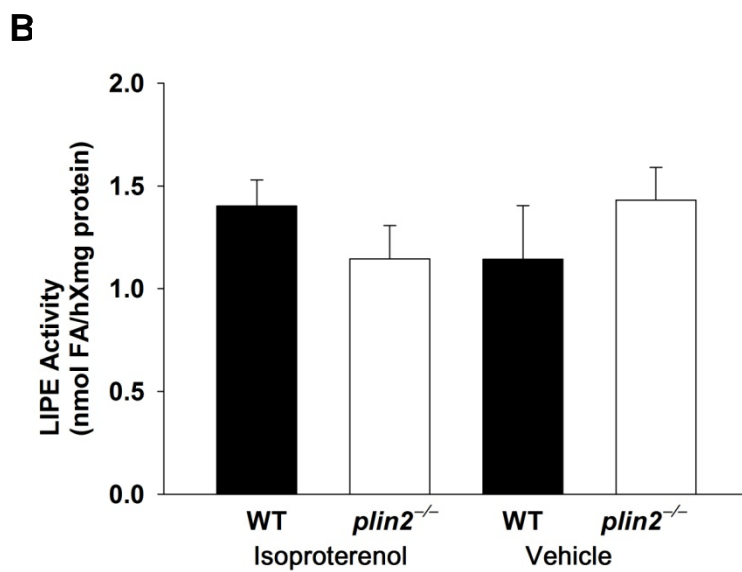

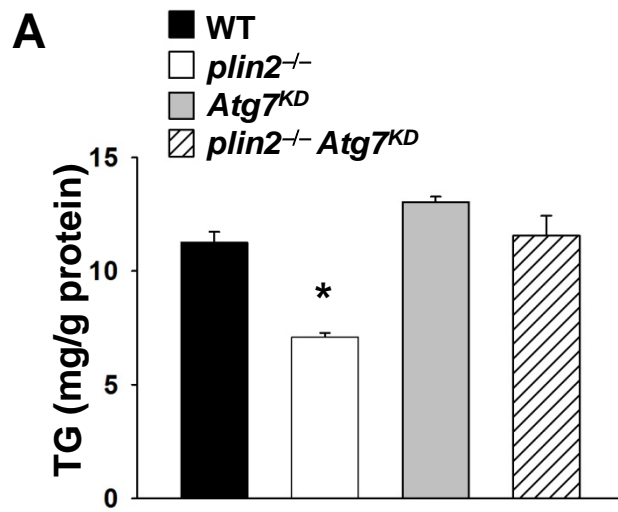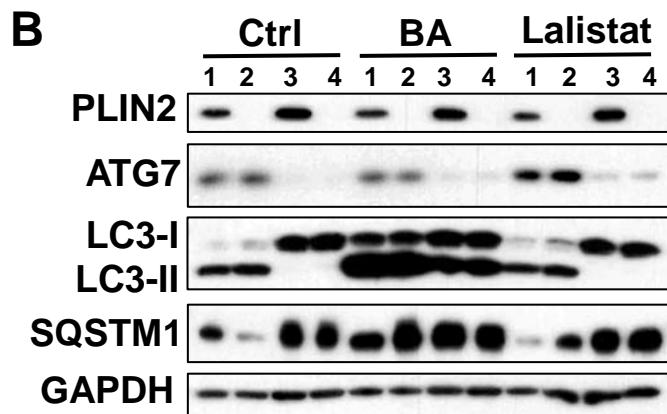



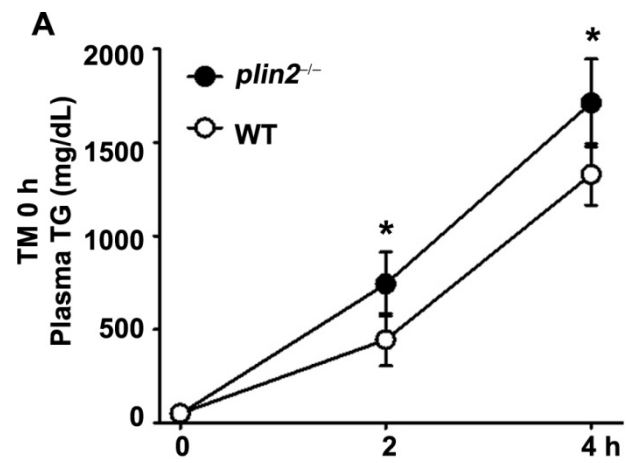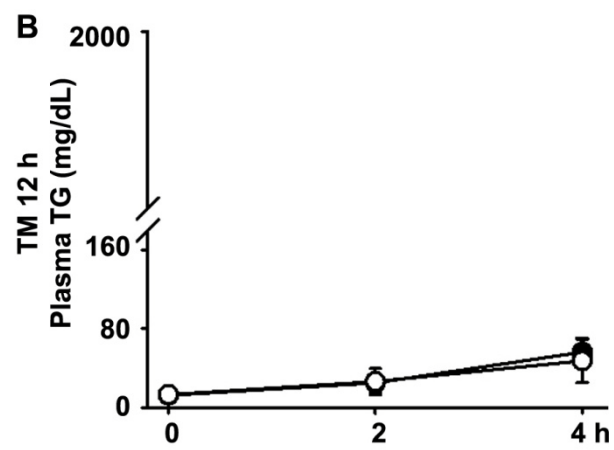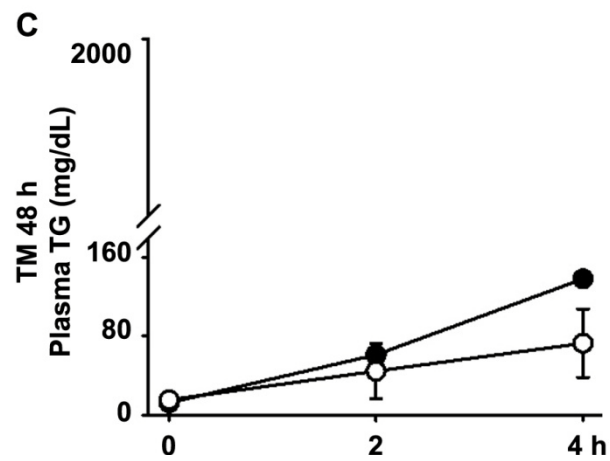

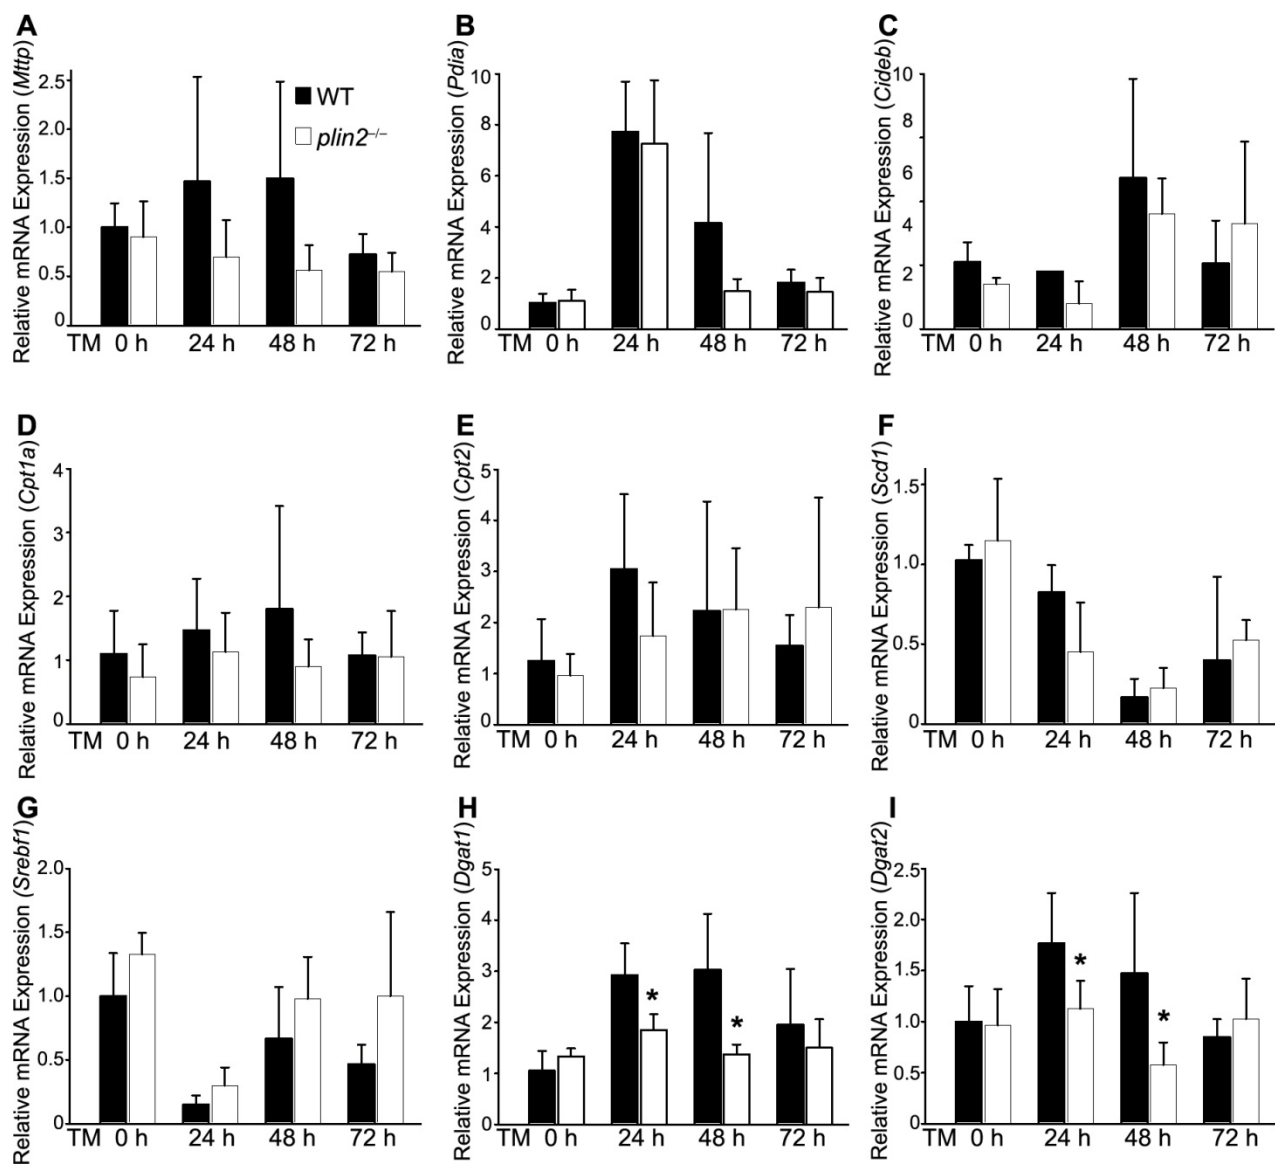

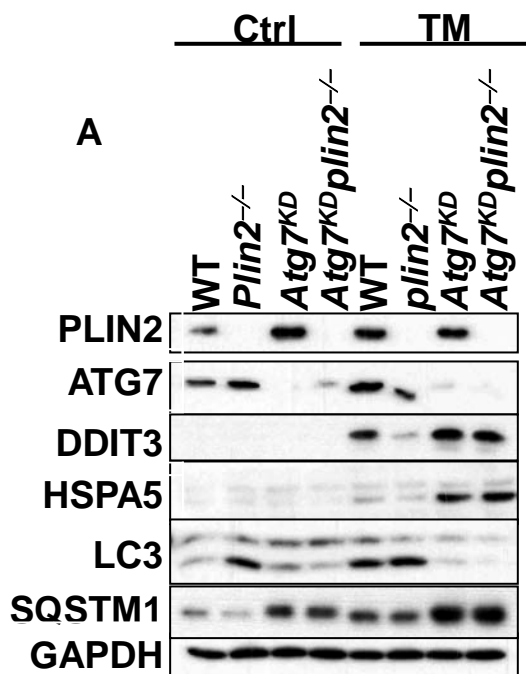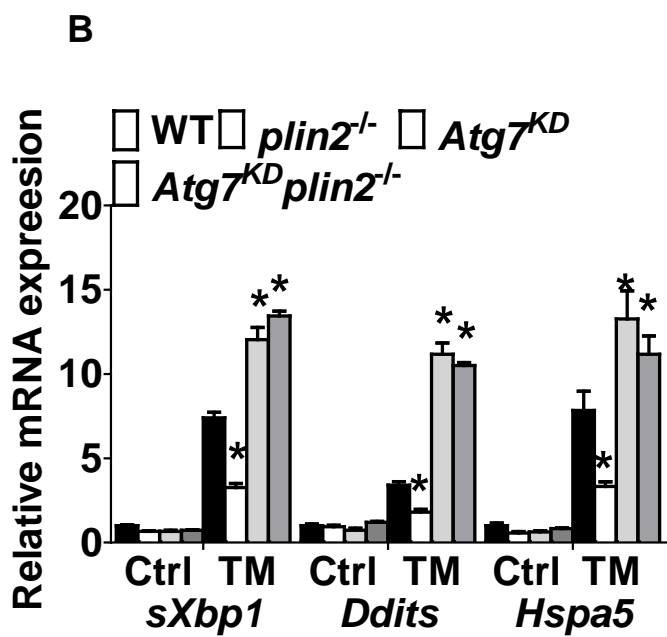

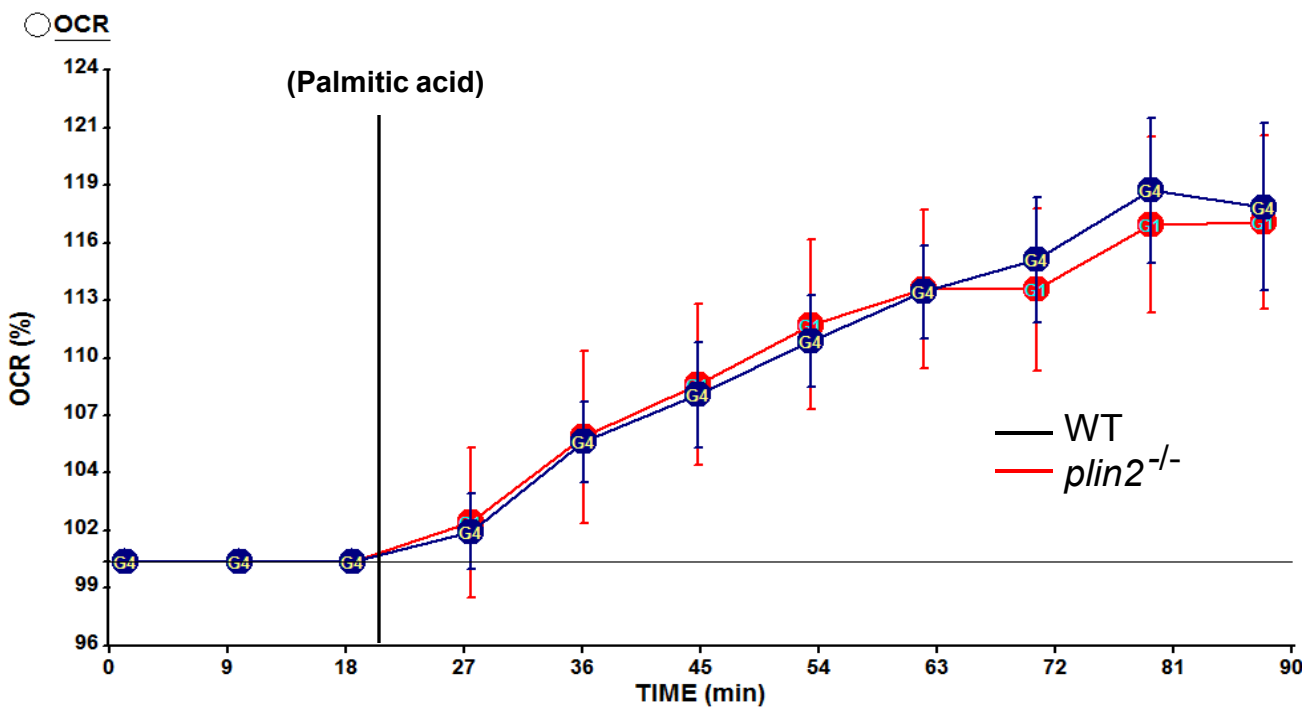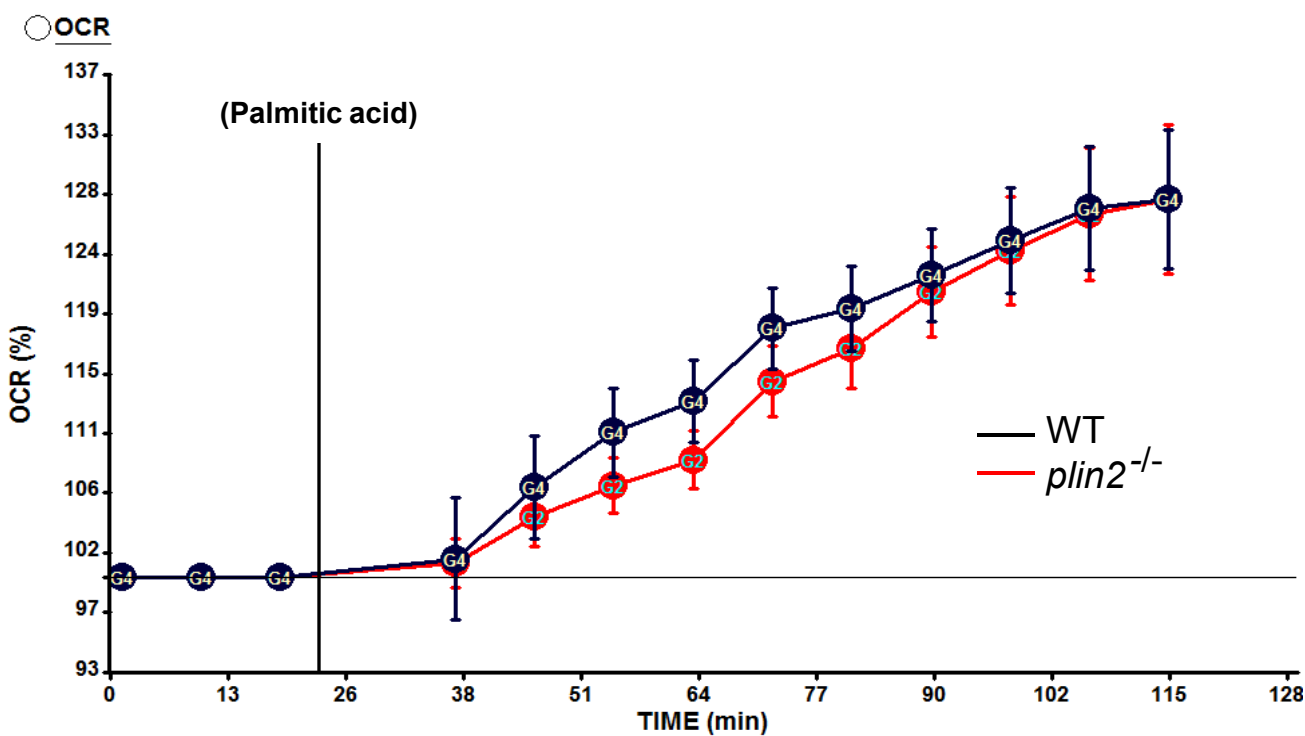

Supplement: Supplementary file 1 [file 2]
